# Supplementary material for: Genome-wide transcriptional analyses in Anopheles mosquitoes reveal an unexpected association between salivary gland gene expression and insecticide resistance
Source: PubMed Central journal article supplement (PMC5870100; doi:10.1186/s12864-018-4605-1), 2018-03-27

|             | Kisumu Control | Nagongera exposed | Nagongera control | Kihihi exposed | Kihihi control |
|-------------|----------------|-------------------|-------------------|----------------|----------------|
| Replicate 1 | 0.1            | 1.1               | 2.1               | 3.1            | 4.1            |
| Replicate 2 | 0.2            | 1.2               | 2.2               | 3.2            | 4.2            |
| Replicate 3 | 0.3            | 1.3               | 2.3               | 3.3            | 4.3            |
| Replicate 4 | 0.4            | 1.4               | 2.4               | 3.4            | 4.4            |

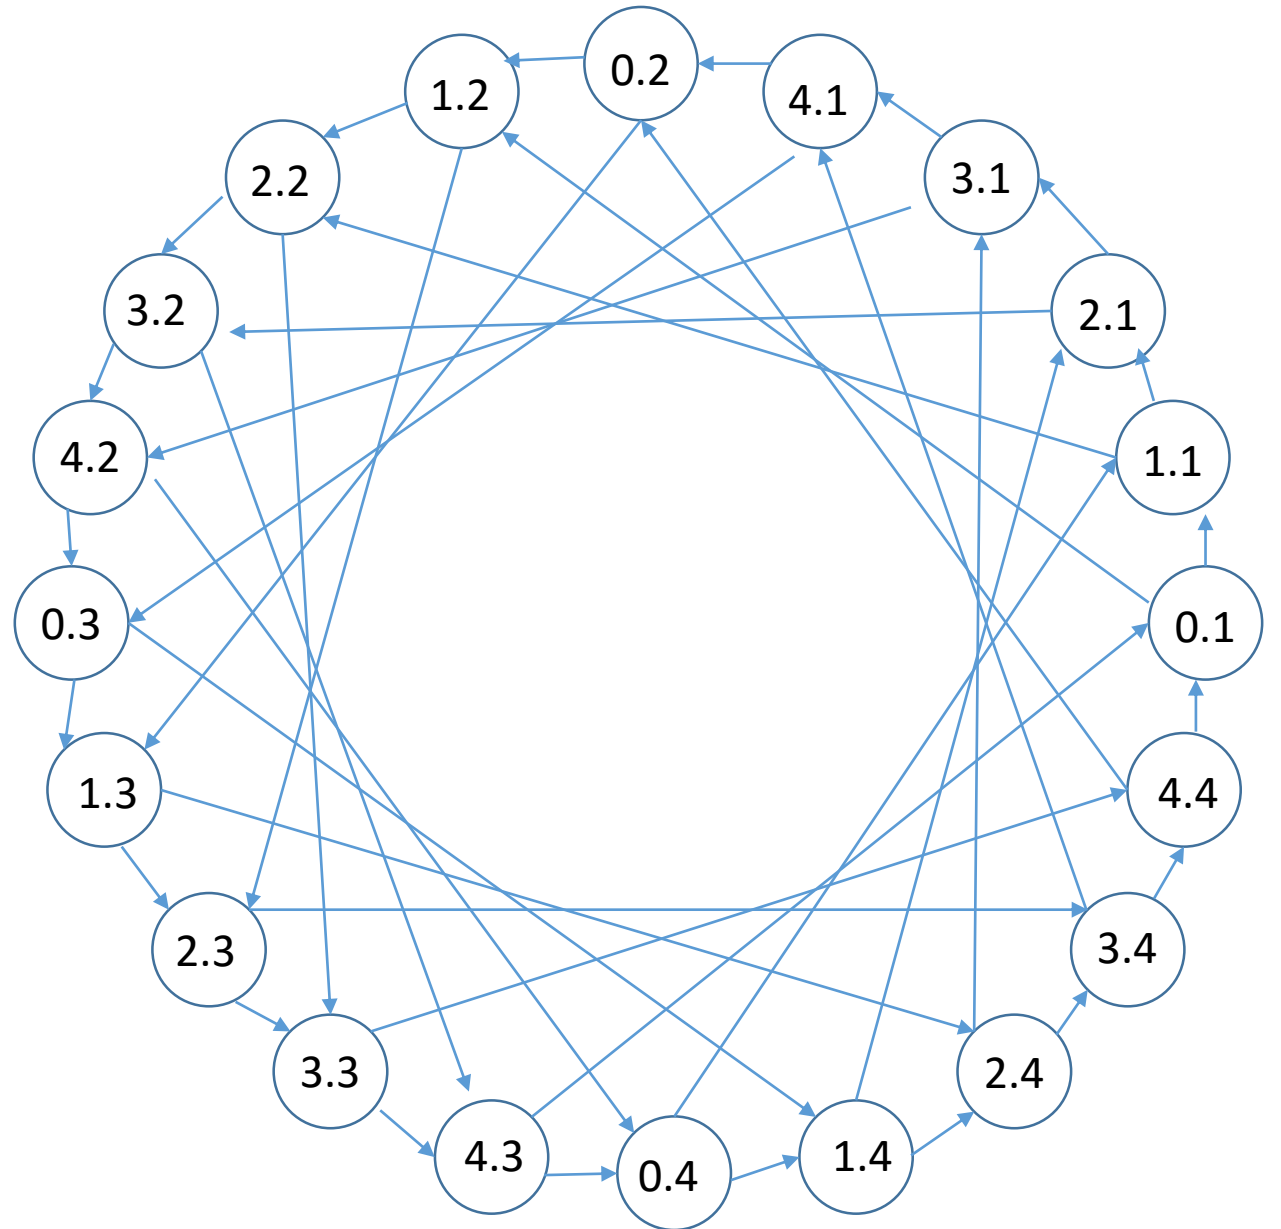

Supplement: 12864_2018_4605_MOESM5_ESM.pdf [file 12864_2018_4605_MOESM5_ESM.pdf]
